# Supplementary material for: Complex plant-derived organic aerosol as ice-nucleating particles – more than a sum of their parts?
Source: Copernicus journal article supplement (doi:10.5194/acp-2019-869), 2019-11-11
Supplement: Supplementary file 1 [file acp-2019-869-supplement.pdf]

## Supplementary Material

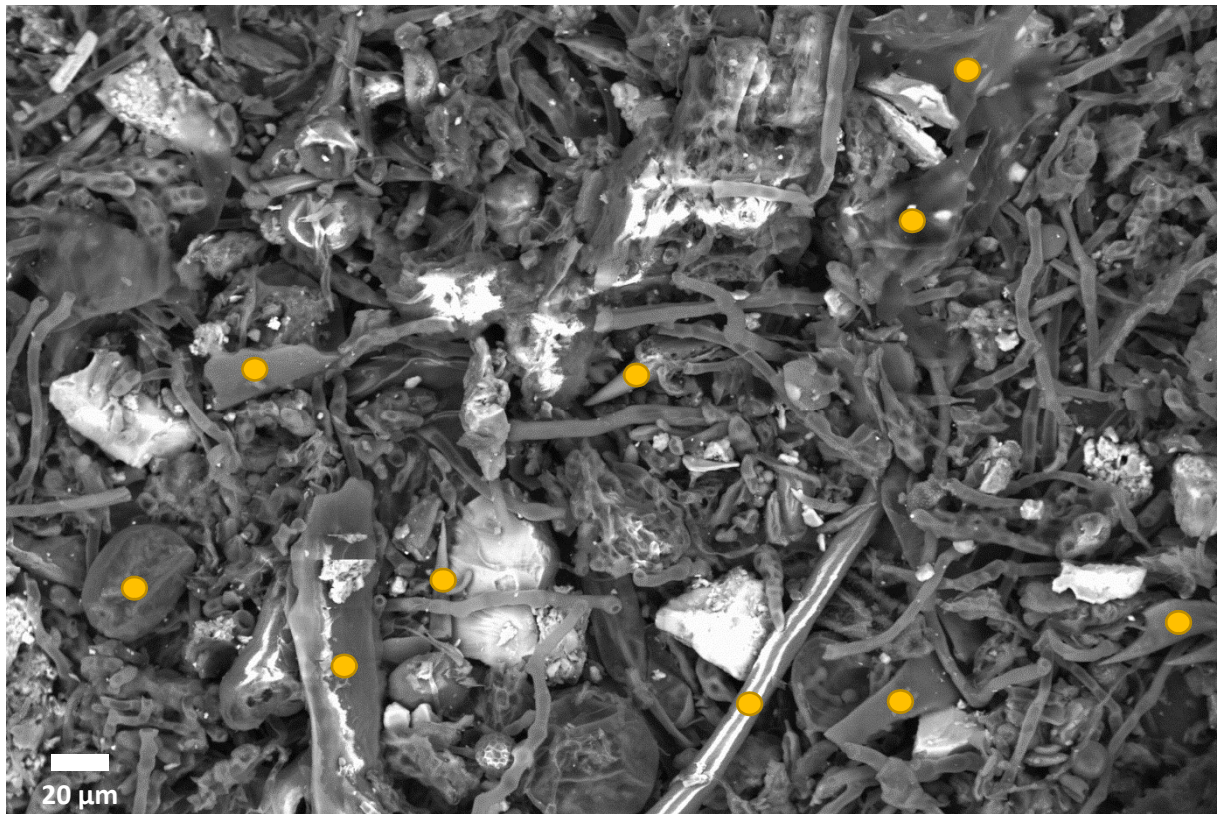

**Figure S1:** Overview of harvesting dust bulk sample from scanning electron microscopy – yellow dots highlight plant material (awns, plant cell remains, plant hair)

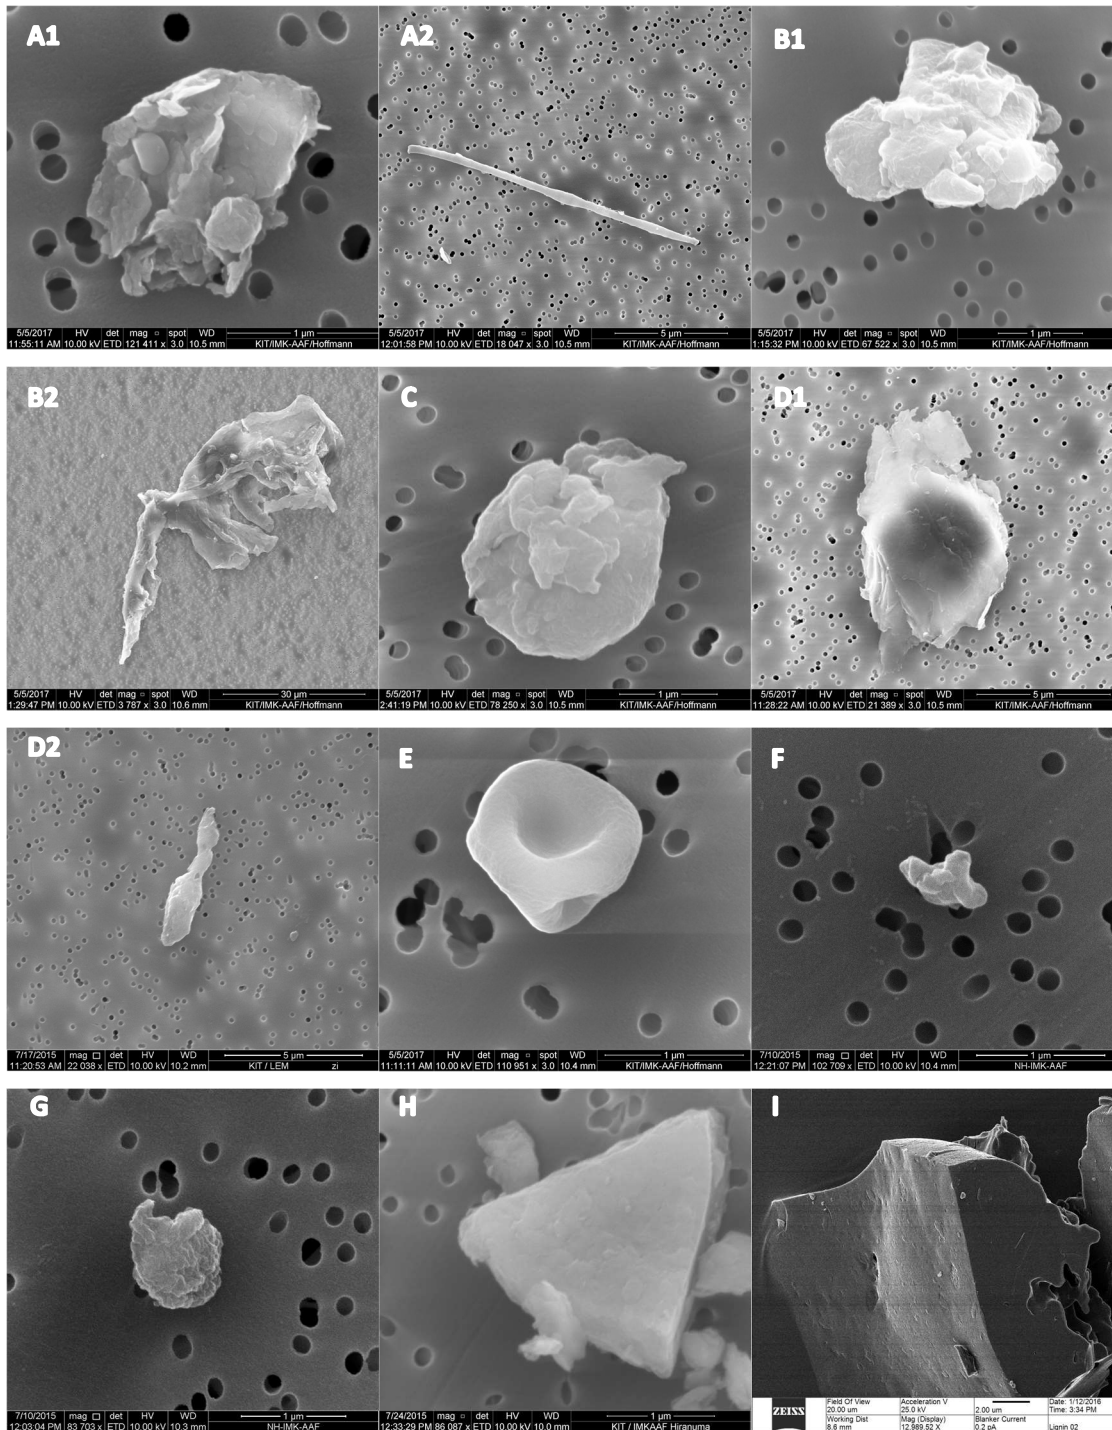

**Figure S2:** Scanning electron microscopy images of particles from the AIDA cloud chamber: (A1 and A2) harvesting dust, (B1 and B2) leaf litter, (C) rice protein, (D1 and D2) soy protein, (E) alginate, (F) pectin, (G) carnauba wax, (H) sugar beet soil dust; (I) high resolution helium ion microscopy image of an individual lignin particles
